# Supplementary material
Source: publisher site journal article supplement (https://www.dovepress.com/get_supplementary_file.php?f=391468.docx)
Supplement: Supplementary file 1 [file get_supplementary_file.php]

**Supplementary table 1** sequence of subgenomic primers of capsular serum type and virulence factor

| Gene |  | Sequence (5'→3') | |
| --- | --- | --- | --- |
| K1 |  | F: GGTGCTCTTTACATCATTGC |
|  | R: GCAATGGCCATTTGCGTTAG |
| K2 |  | F: GACCCGATATTCATACTTGACAGAG |
|  | R: CCTGAAGTAAAATCGTAAATAGATGGC |
| K5 |  | F: TGGTAGTGATGCTCGCGA |
|  | R: CCTGAACCCACCCCAATC |
| K20 |  | F: CGGTGCTACAGTGCATCATT |
|  | R: GTTATACGATGCTCAGTCGC |
| K54 |  | F: CATTAGCTCAGTGGTTGGCT |
|  | R: GCTTGACAAACACCATAGCAG |
| K57 |  | F: CTCAGGGCTAGAAGTGTCAT |
|  | R: CACTAACCCAGAAAGTCGAG |
| *rmpA* |  | F: ACTGGGCTACCTCTGCTTCA |
|  | R: CTTGCATGAGCCATCTTTCA |
| *irp2* |  | F: AAGGATTCGCTGTTACCGGAC |
|  | R: TCGTCGGGCAGCGTTTCTTCT |
| *entB* |  | F: ATTTCCTCAACTTCTGGGGC |
|  | R: AGCATCGGTGGCGGTGGTCA |
| *iucD* |  | F: ACAAAAAGTTCTATCGCTTCC |
|  | R: CCTGATCCAGATGATGCTC |
| *aero* |  | F: GCATAGGCGGATACGAACAT |
|  | R: CACAGGGCAATTGCTTACCT |
| wcaG |  | F: GGTTGGKTCAGCAATCGTA |
|  | R: ACTATTCCGCCAACTTTTGC |
| *iutA* |  | F: GGCTGGACATCATGGGAACTGG |
|  | R: CGTCGGGAACGGGTAGAATCG |
| *kfu* |  | F: GAAGTGACGCTGTTTCTGGC |
|  | R: TTTCGTGTGGCCAGTGACTC |
| *iroN* |  | F: AAGTCAAAGCAGGGGTTGCCCG |
|  | R: GACGCCGACATTAAGACGCAG |
| *iroNB* |  | F: GGCTACTGATACTTGACTATTC |
|  | R: CAGGATACAATAGCCCATAG |

Note: All primers were designed in BIGSdb-Pasteur web (https://bigsdb.pasteur.fr/klebsiella/primers-used/)


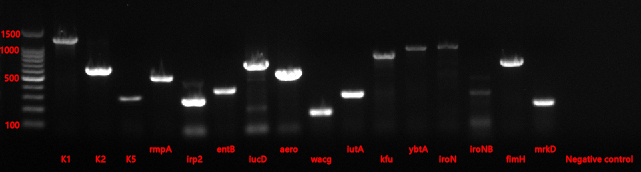


**Supplementary Figure 1** KPN capsule serum type and virulence factor positive results.

**Supplementary table 2** multiple site sequence typing of *Klebsiella pneumoniae*: sequence of 7 housekeeping primers

| Housekeeping gene | Sequence (5'→3') | Fragment size (bp) |
| --- | --- | --- |
| rpoB | F:GTTTTCCCAGTCACGACGTTGTAGGCGAAATGGCCGAGAACCA | 501 |
| R:TTGTGAGCGGATAACAATTTCGAGTCTTCGAAGTTGTAACC |
| gapA | F:GTTTTCCCAGTCACGACGTTGTATGAAATATGACTCCACTCACGG | 450 |
| R:TTGTGAGCGGATAACAATTTCCTTCAGAAGCGGCTTTGATGGCTT |
| mdh | F:GTTTTCCCAGTCACGACGTTGTACCCAACTCGCTTCAGGTTCAG | 477 |
| R:TTGTGAGCGGATAACAATTTCCCGTTTTTCCCCAGCAGCAG |
| pgi | F:GTTTTCCCAGTCACGACGTTGTAGAGAAAAACCTGCCTGTACTGCTGC | 432 |
| R:TTGTGAGCGGATAACAATTTCCGCGCCACGCTTTATAGCGGTTAAT |
| phoE | F:GTTTTCCCAGTCACGACGTTGTAACCTACCGCAACACCGACTTCTTCGG | 420 |
| R:TTGTGAGCGGATAACAATTTCTGATCAGAACTGGTAGGTGAT |
| infB | F:GTTTTCCCAGTCACGACGTTGTACTCGCTGCTGGACTATATTCG | 318 |
| R:TTGTGAGCGGATAACAATTTCCGCTTTCAGCTCAAGAACTTC |
| tonB | F:GTTTTCCCAGTCACGACGTTGTACTTTATACCTCGGTACATCAGGTT | 414 |
| R:TTGTGAGCGGATAACAATTTCATTCGCCGGCTGCGCGGAGAG |
